# Supplementary material for: Influence of consumption of the food additive carrageenan on the gut microbiota and the intestinal homeostasis of mice
Source: Royal Society of Chemistry journal article supplement (doi:10.1039/d4fo01418a), 2024-01-01
Supplement: d4fo01418a1.pdf [file d4fo01418a1.pdf]

Table S1. Immune functions [Natural killer (NK) anti-tumor cytotoxic activity, lymphoproliferative response to the mitogens lypopolicchararide (LPS) and concanavalin A (ConA), phagocytic index (PI) and phagocytic efficacy (PE)], and oxidative stress parameters [oxidized glutathione (GSSG)/reduced glutathione (GSH) ratio and glutathione reductase (GR) and glutathione peroxidase (GPx) activities] values (mean and SEM) of the female (F) and male (M) mice at the start of the study (age 8 weeks) and after two weeks of carrageenan intake (CGN10w) or PBS in the controls (C10w).

| Function | FC8w          | FC10w          | FCGN10w        | MC8w          | MC10w          | MCGN10w        |
|----------|---------------|----------------|----------------|---------------|----------------|----------------|
| NK (%)   | 51.79 (3.48)  | 45.16 (2.90)   | 35.72 (1.65)   | 42.84 (2.45)  | 45.14 (2.87)   | 35.70 (3.92)   |
| LPS (%)  | 104.40 (3.65) | 107.18 (3.39)  | 101.29 (2.68)  | 104.11 (3.46) | 108.21 (3.16)  | 89.75 (6.11)   |
| ConA (%) | 102.43 (3.12) | 114.99 (2.60)  | 104.70 (1.22)  | 105.25 (3.33) | 118.38 (2.84)  | 94.67 (3.02)   |
| PI       | ND            | 576.12 (33.94) | 340.67 (43.88) | ND            | 579.14 (59.29) | 390.37 (26.27) |
| PF       | ND            | 83.75 (1.00)   | 76.62 (1.29)   | ND            | 84.25 (0.84)   | 78.86 (1.03)   |
| GSSG/GSH | ND            | 0.06 (0.02)    | 0.36 (0.14)    | ND            | 0.25 (0.11)    | 0.38 (0.18)    |
| GR       | ND            | 9.25 (2.44)    | 1.94 (0.53)    | ND            | 3.36 (0.69)    | 1.01 (0.52)    |
| GPx      | ND            | 34.03 (10.01)  | 27.21 (9.90)   | ND            | 14.38 (7.89)   | 17.06 (7.89)   |

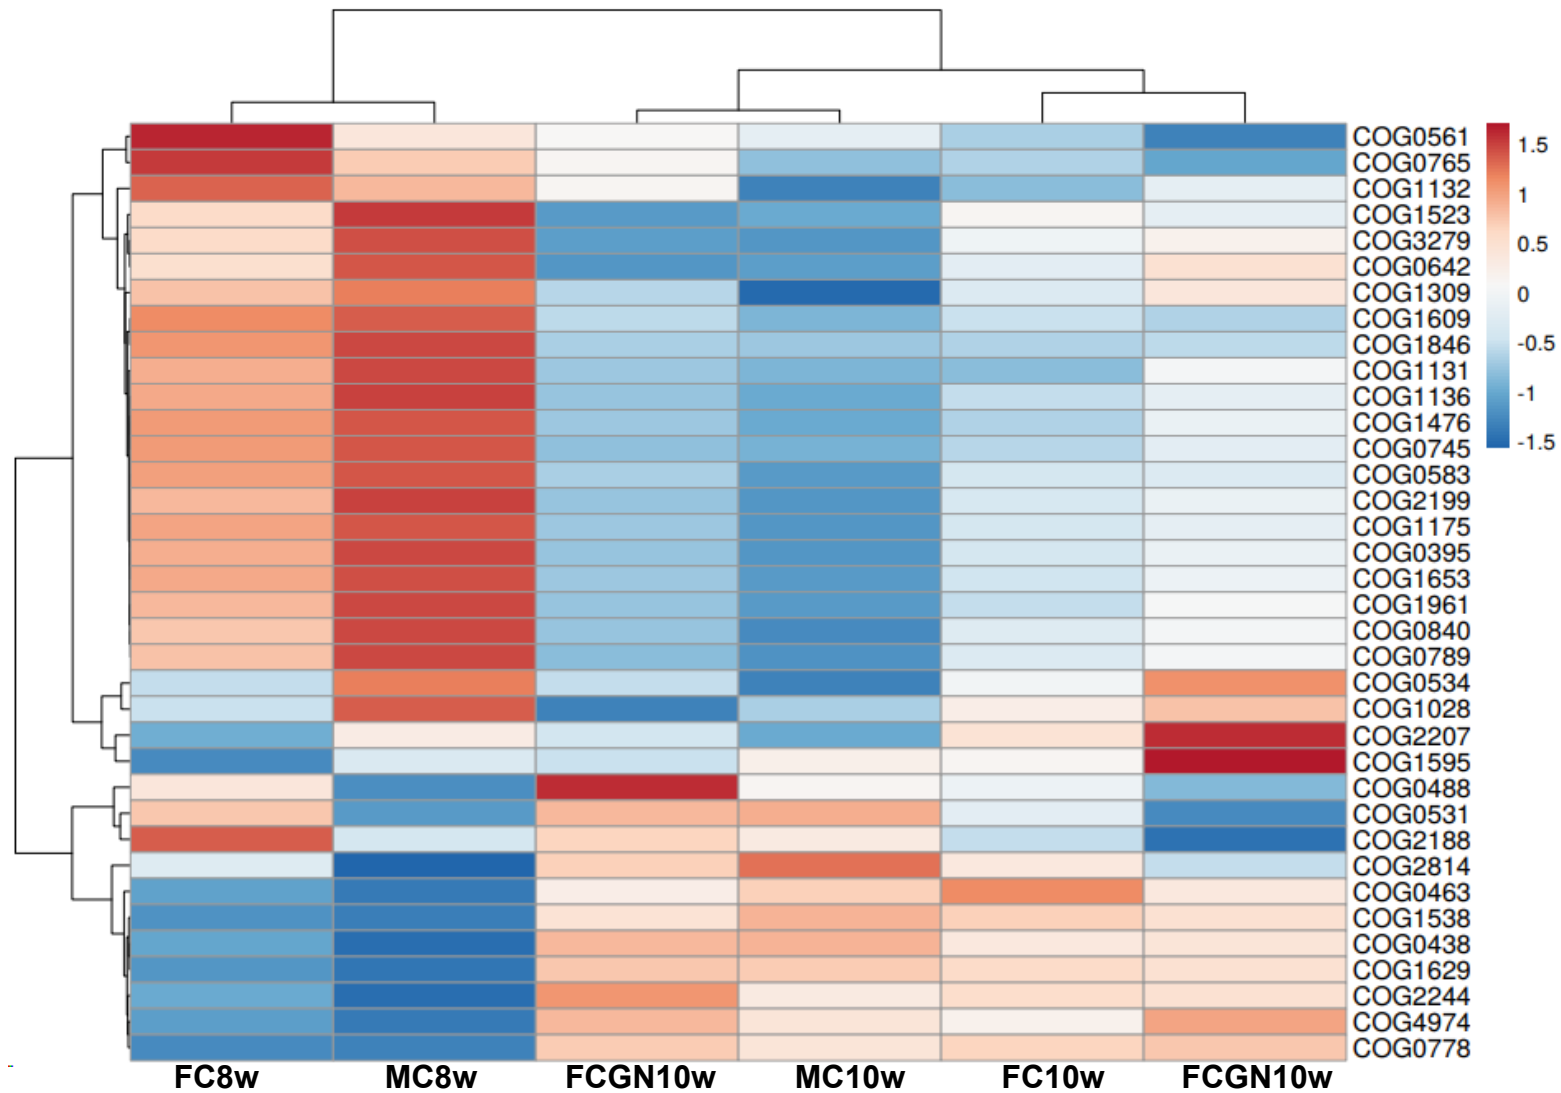

Fig. S1. Heatmap of the top 36 abundant clusters of orthologous genes (COG) predicted by PICRUSt2 analysis from the 16S rRNA gene sequencing data of the faecal microbiota from the female (F) and male (M) mice at the start of the study (age 8 weeks) and after two weeks of carrageenan intake (CGN10w) or PBS in the controls (C10w).

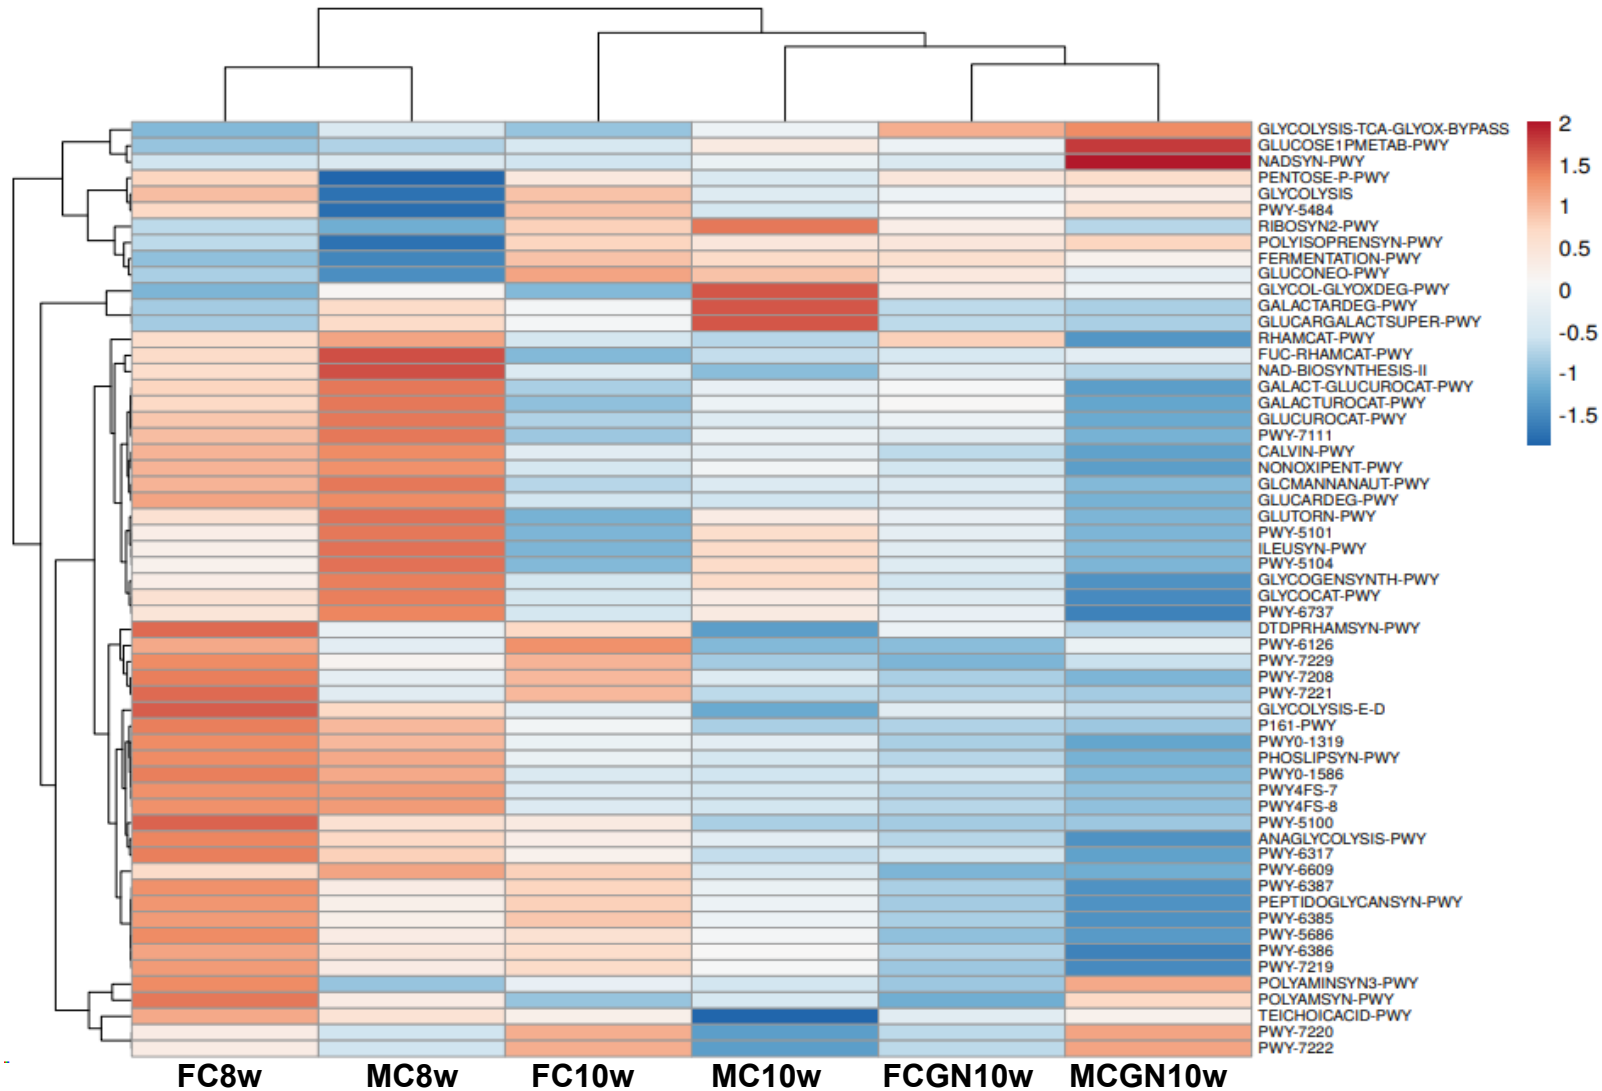

Fig. S2. Heatmap of the top 57 abundant pathways (PWY) predicted by PICRUSt2 analysis from the 16S rRNA gene sequencing data of the faecal microbiota from the female (F) and male (M) mice at the start of the study (age 8 weeks) and after two weeks of carrageenan intake (CGN10w) or PBS in the controls (C10w).

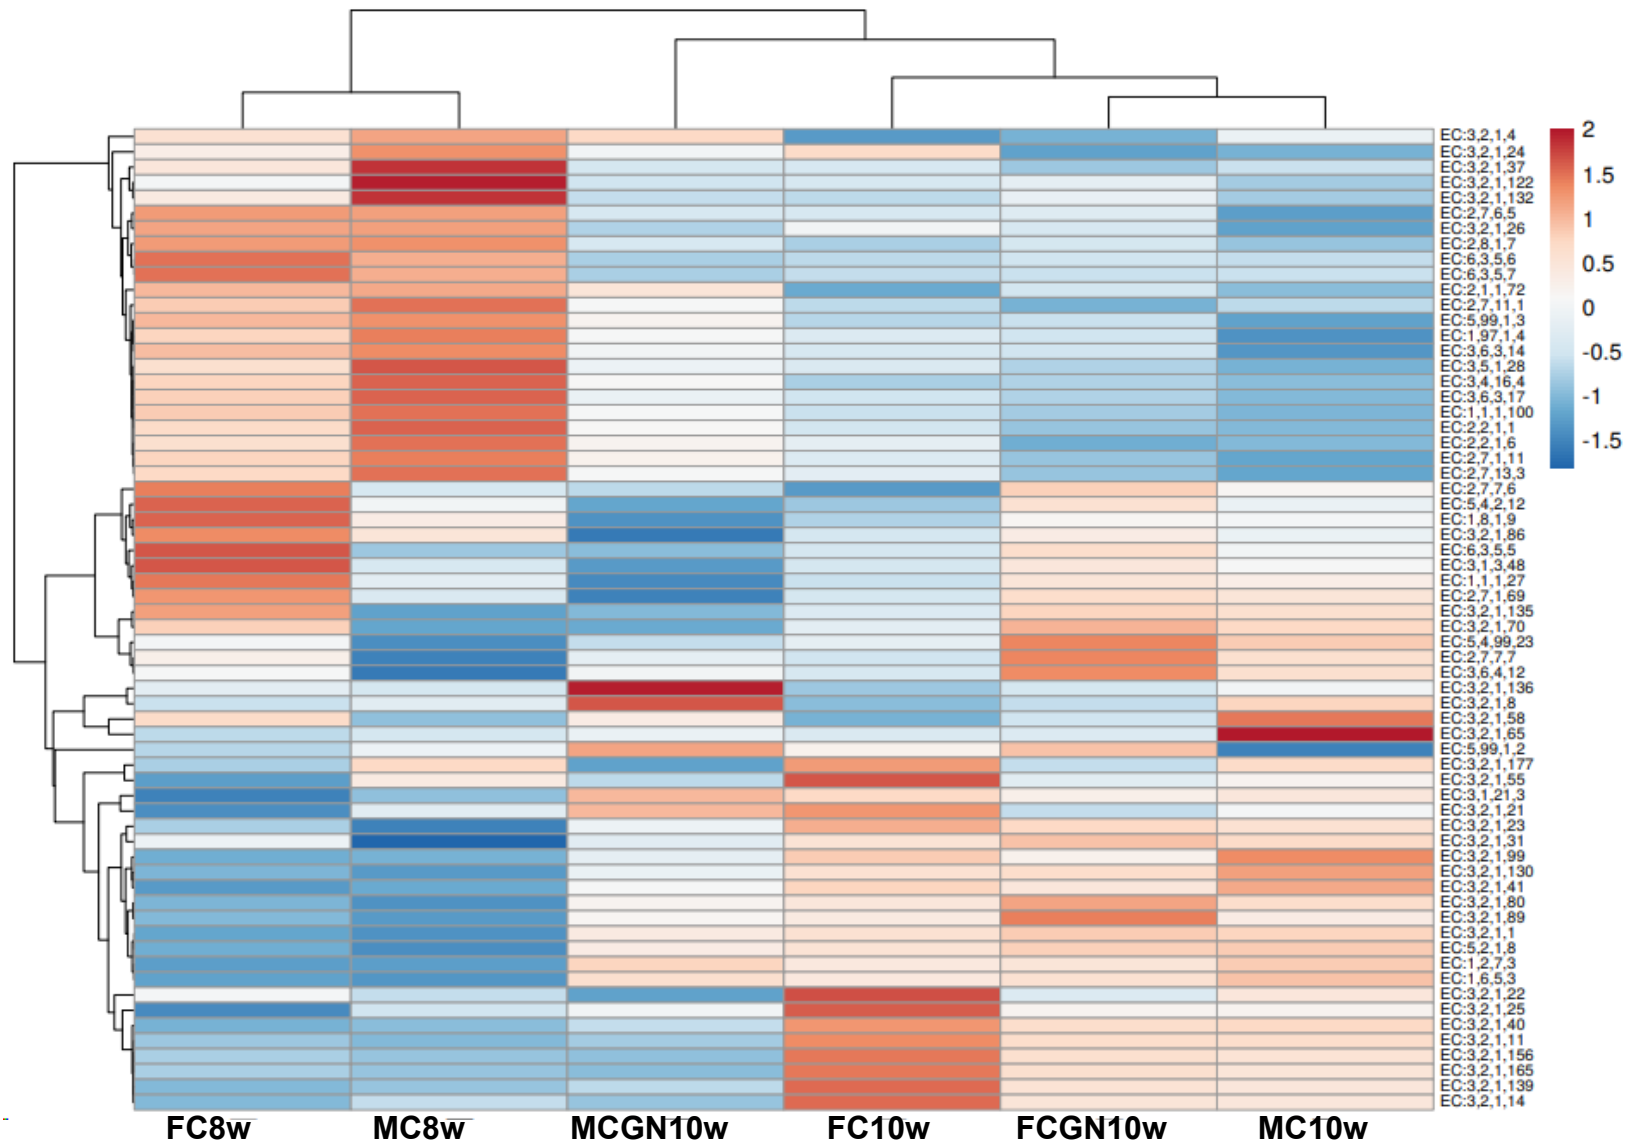

Fig. S3. Heatmap of the top 65 abundant enzymes (EC number) predicted by PICRUSt2 analysis from the 16S rRNA gene sequencing data of the faecal microbiota from the female (F) and male (M) mice at the start of the study (age 8 weeks) and after two weeks of carrageenan intake (CGN10w) or PBS in the controls (C10w)

A

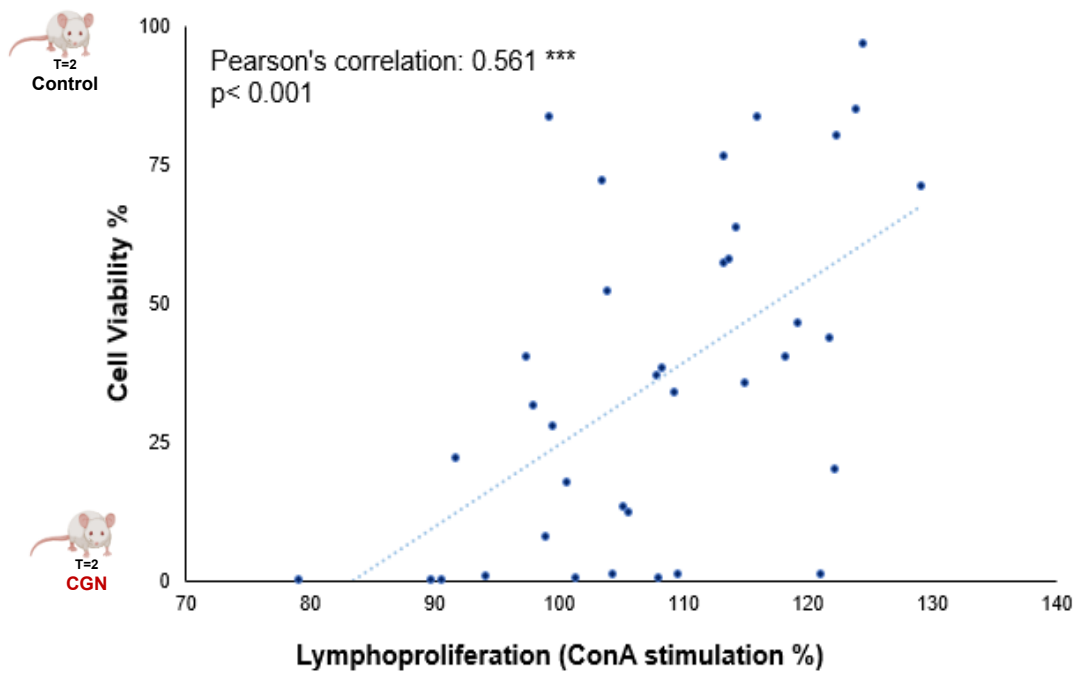

B

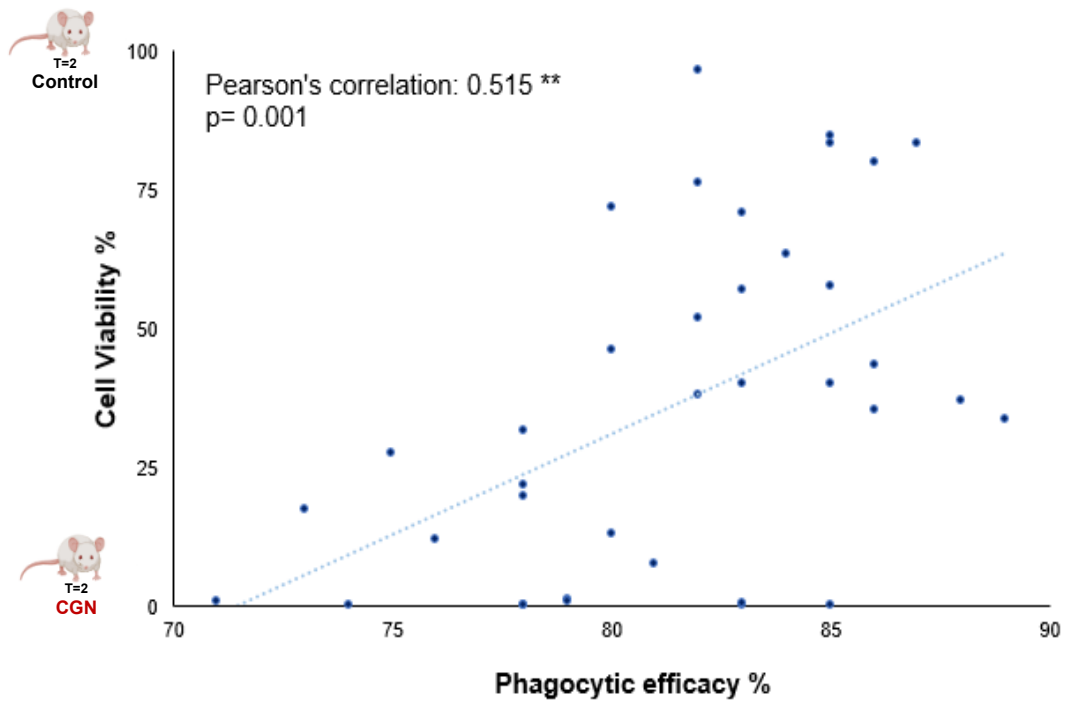

Figure S4. Correlation between Caco-2 viability and (A) the lymphoproliferative response to the mitogen concanavalin A (ConA stimulation), and (B) the peritoneal macrophage phagocytic efficacy.
